# Supplementary material
Source: MDPI journal article supplement (https://www.mdpi.com/1996-1073/13/9/2352)
Supplement: s1 [file s1]

## Supplementary Materials

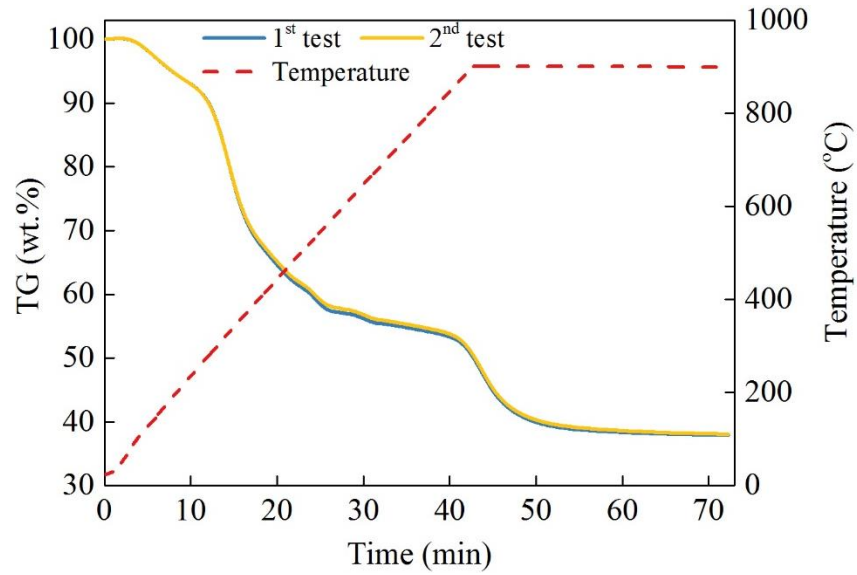

**Figure S1.** The repeated TGA experiment of the mixture fuel with 82 wt.% cyanobacteria and 18 wt.% coal (82CYA sample).

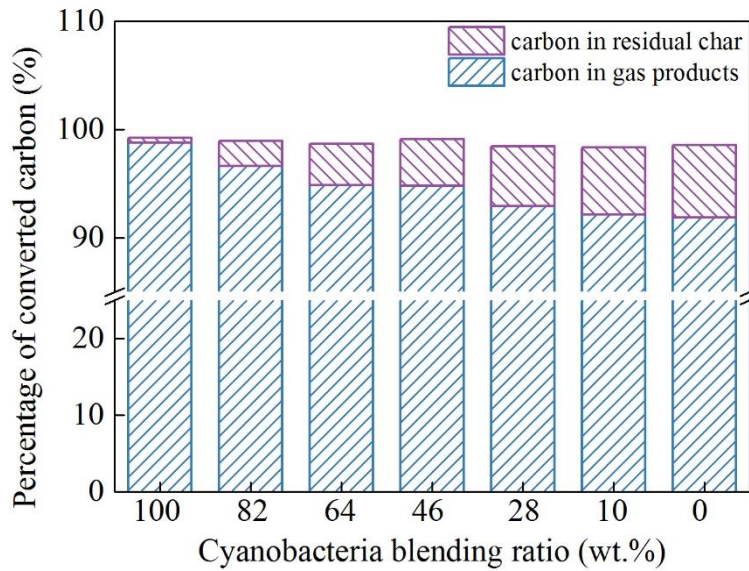

**Figure S2.** The carbon balance as a function of the cyanobacteria blending ratio.
